# Supplementary material
Source: Springer Nature journal article supplement (https://mijn.bsl.nl/resource/supplementary/13047_2011_460_MOESM4_ESM.pdf/7111726)

95% CI Foot length [mm]

275  
270  
265  
260  
255  
250  
245

Non – diabetic participants

Diabetic participants

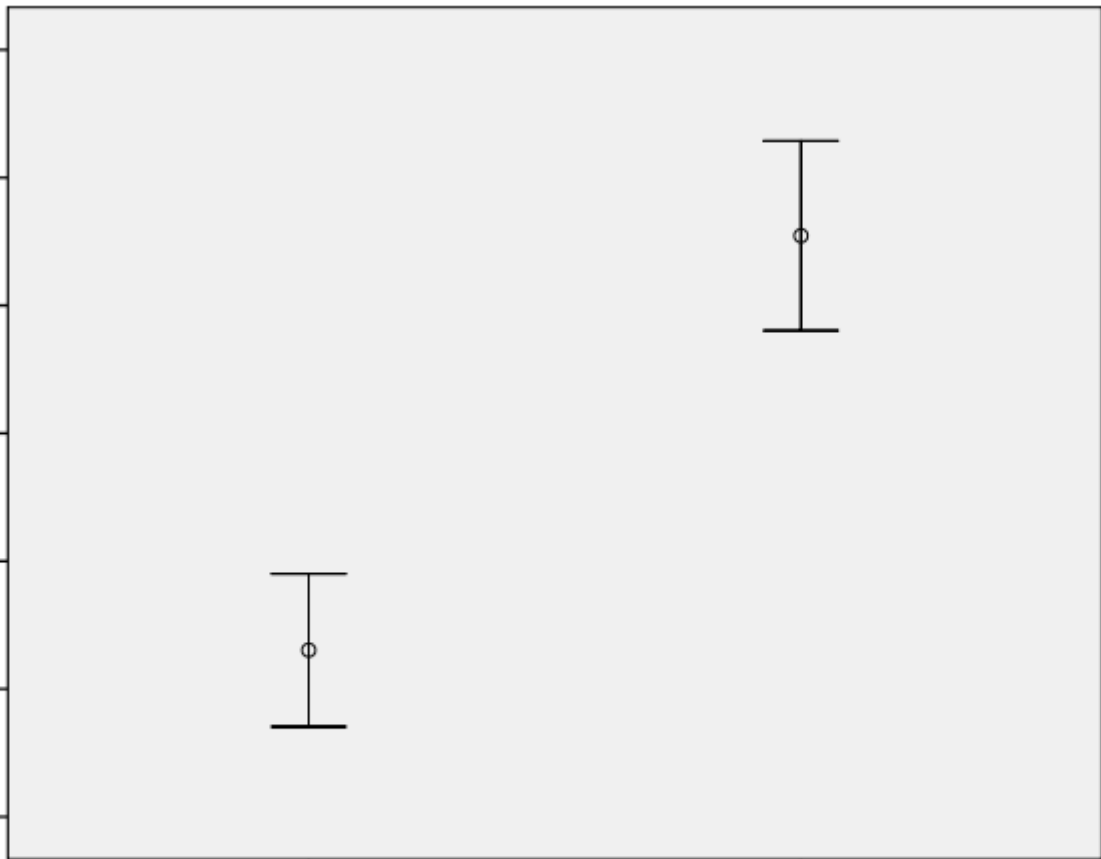

Supplement: MOESM4 [file 7111726]
